# Supplementary material for: Preparation of Sn-aminoclay (SnAC)-templated Fe3O4 nanoparticles as an anode material for lithium-ion batteries
Source: PubMed Central journal article supplement — RSC Adv. 2019 Apr 4;9(19):10536–45. doi: 10.1039/c9ra00424f (PMC9062553; doi:10.1039/c9ra00424f), 2019-04-04
Supplement: RA-009-C9RA00424F-s001.pdf [file RA-009-C9RA00424F-s001.pdf]

**Preparation of Sn-aminoclay (SnAC)-templated Fe<sub>3</sub>O<sub>4</sub> nanoparticles as anode material  
for lithium-ion batteries**

Tuyet Nhung Pham<sup>a</sup>, Salunkhe Tejaswi Tanaji<sup>b</sup>, Jin Seok Choi<sup>c</sup>, Hyun-Uk Lee<sup>d</sup>,  
Il Tae Kim<sup>b\*</sup>, Young-Chul Lee<sup>a\*</sup>

<sup>a</sup>Department of BioNano Technology, Gachon University, 1342 Seongnamdaero, Sujeong-gu, Seongnam-si, Gyeonggi-do 13120, Republic of Korea; [nhungpham240694@gmail.com](mailto:nhungpham240694@gmail.com)

<sup>b</sup>Department of Chemical and Biological Engineering, Gachon University, Seongnam-si, Gyeonggi-do 13120, Republic of Korea; [tejaswisalunkhe235@gmail.com](mailto:tejaswisalunkhe235@gmail.com); [itkim@gachon.ac.kr](mailto:itkim@gachon.ac.kr)

<sup>c</sup>Analysis Center for Research Advancement, Korea Advanced Institute of Science and Technology (KAIST), Yuseong-gu, Daejeon 34141, Republic of Korea, [ffband@kaist.ac.kr](mailto:ffband@kaist.ac.kr)

<sup>d</sup>Advanced Nano-surface Research Group, Korea Basic Science Institute (KBSI), Daejeon 34133, Republic of Korea; [leeho@kbsi.re.kr](mailto:leeho@kbsi.re.kr)

\*Corresponding author:

Prof. Il Tae Kim, Tel: +82-31-750-8835, Fax: +82-31-750-5363, Email address: [itkim@gachon.ac.kr](mailto:itkim@gachon.ac.kr)

Prof. Young-Chul Lee, Tel: +82-31-750-8751, Fax: +82-31-750-4748, Email address: [dreamdbbs@gachon.ac.kr](mailto:dreamdbbs@gachon.ac.kr) (Y.-C. Lee)

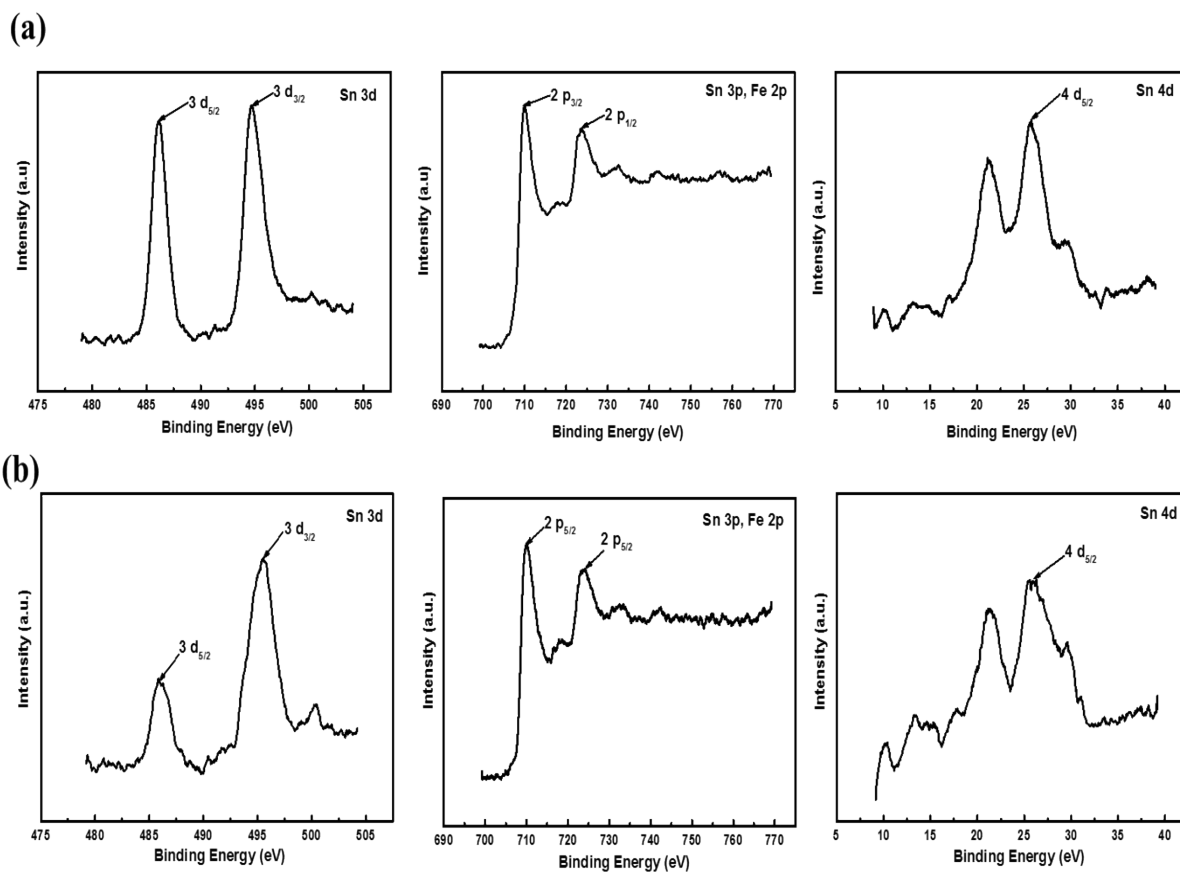

**Fig. S1** XPS of Sn 3d, 4d, 3p species for SnAC-Fe<sub>3</sub>O<sub>4</sub> sample: a) before and (b) after annealing process under Ar gas

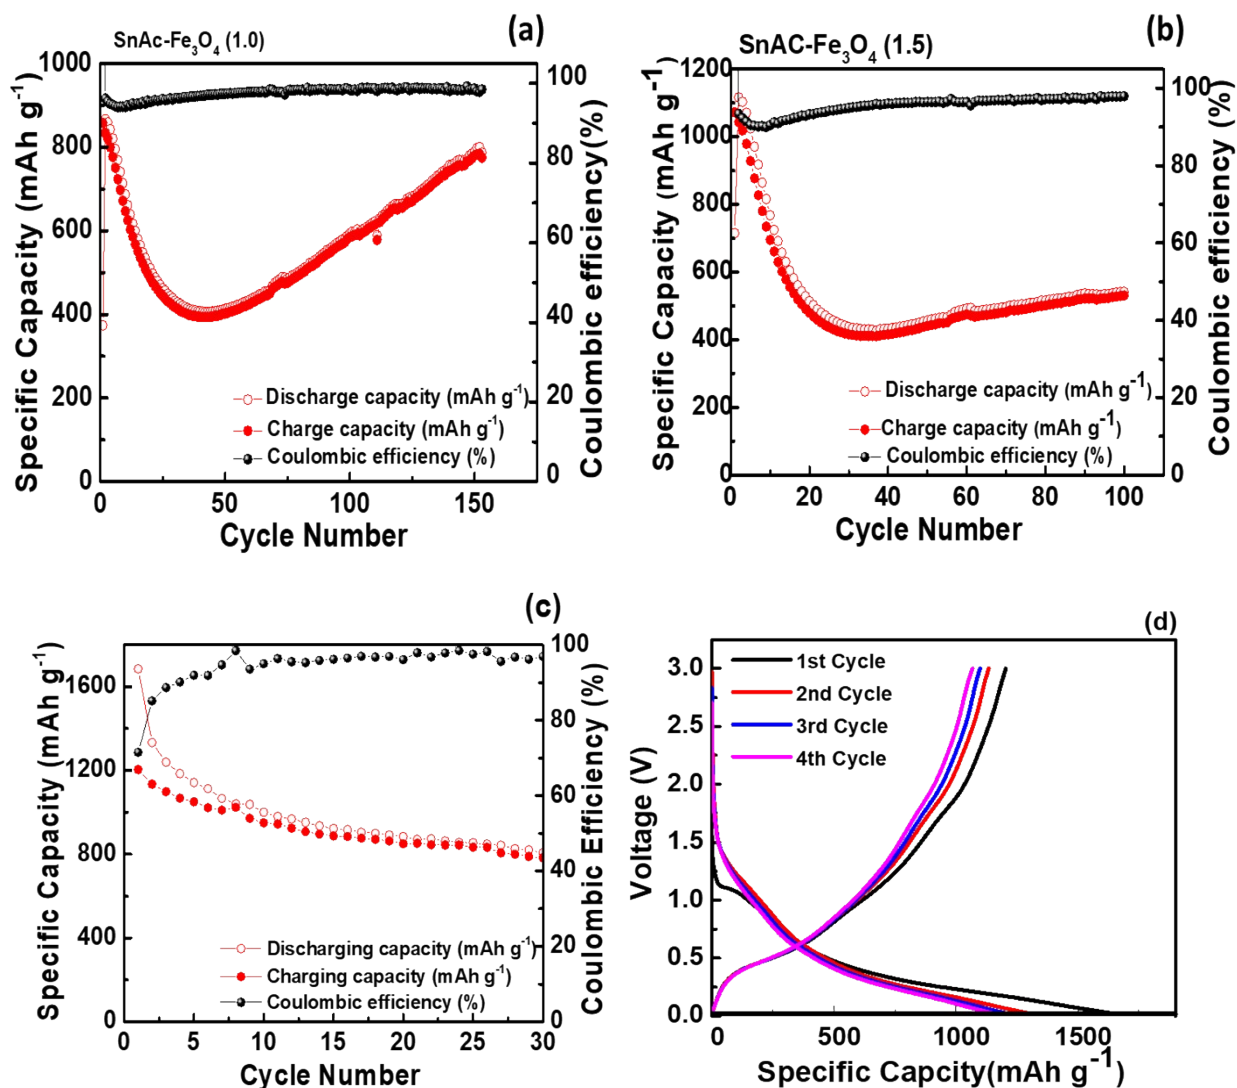

**Fig. S2** (a,b,c) Cycling performance of the SnAC-Fe<sub>3</sub>O<sub>4</sub> electrodes (ratios 1.0 and 1.5) and pure SnAC electrode at a current density of 100 mA g<sup>-1</sup>, (d) Voltage profiles plotted for the first, second, third, 4<sup>th</sup>, cycles of the pure SnAC electrode at a current density of 100 mA g<sup>-1</sup>.

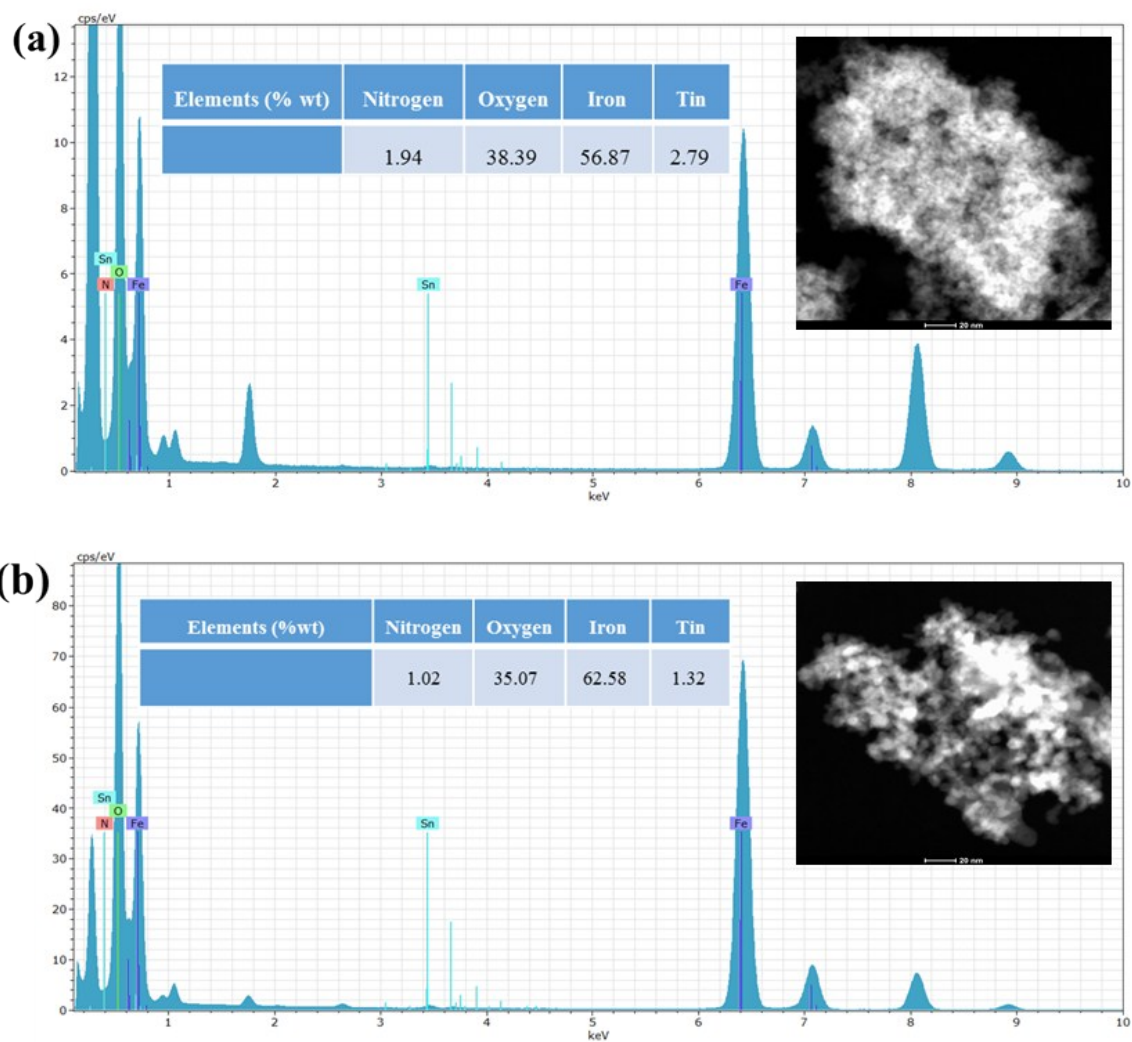

**Fig. S3** Percentage of elements in EDX spectra for SnAC-Fe<sub>3</sub>O<sub>4</sub> nanocomposites (a) before, and after annealing process.
